# Supplementary material
Source: PubMed Central journal article supplement (PMC11524066)

**a**

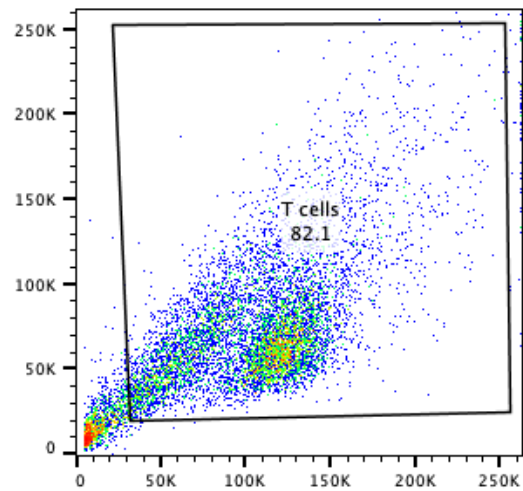

Vehicle

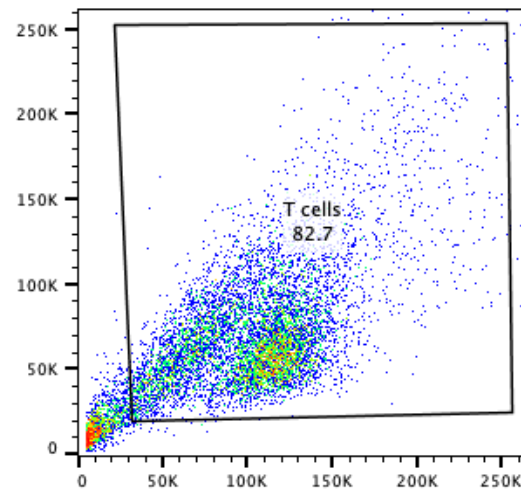

Ipilimumab

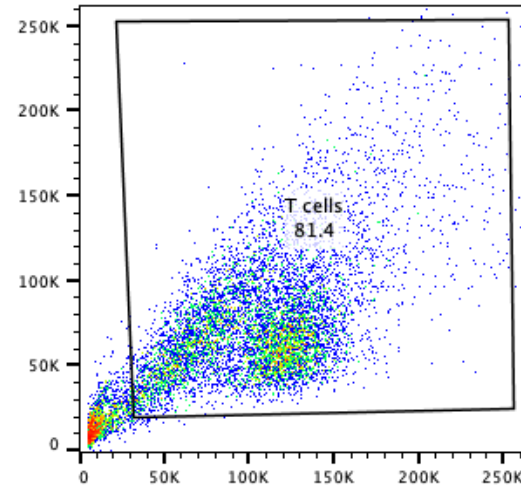

A9 10  $\mu$ M

FSC SSC  
T cell gate

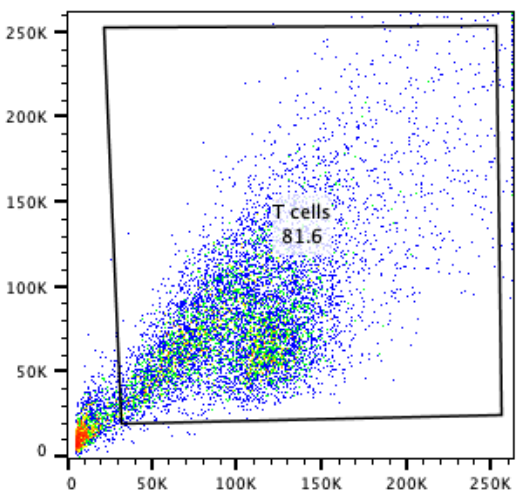

A9 50  $\mu$ M

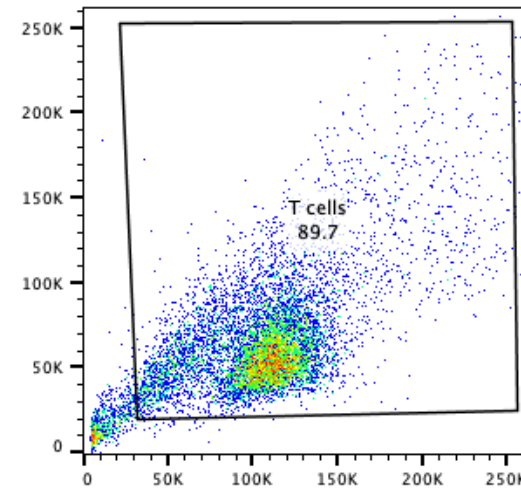

D11 10  $\mu$ M

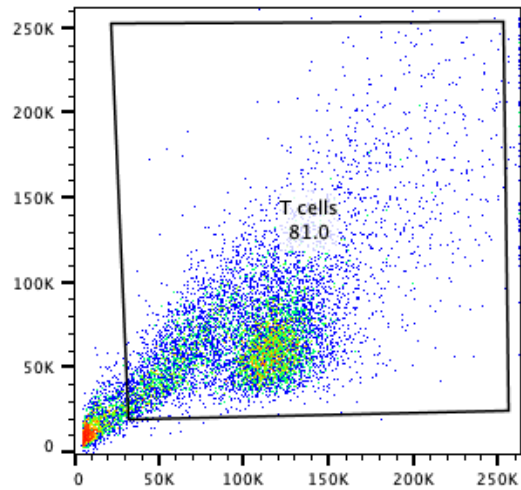

D11 50  $\mu$ M

SSC-A  
↑  
FSC-A  
→

**b**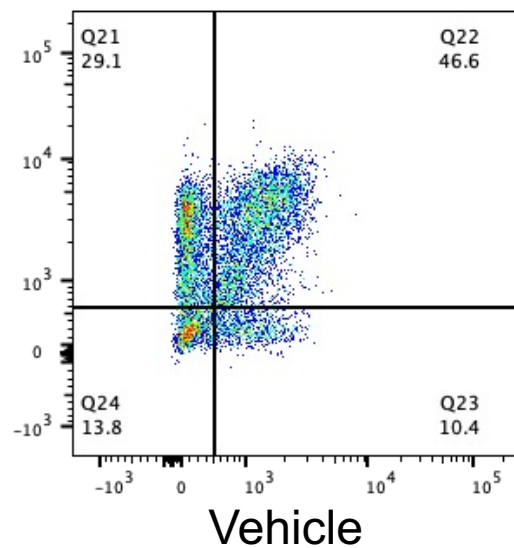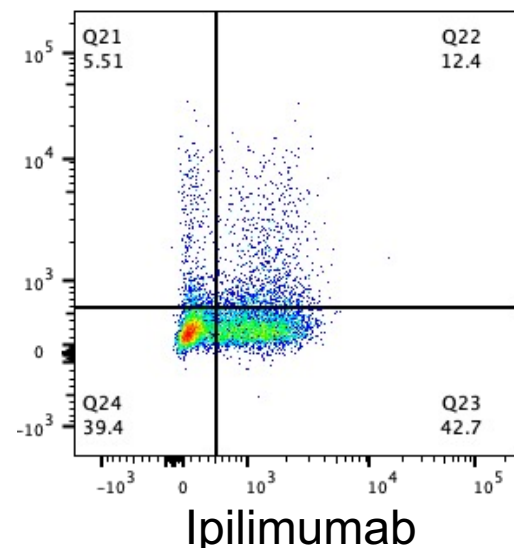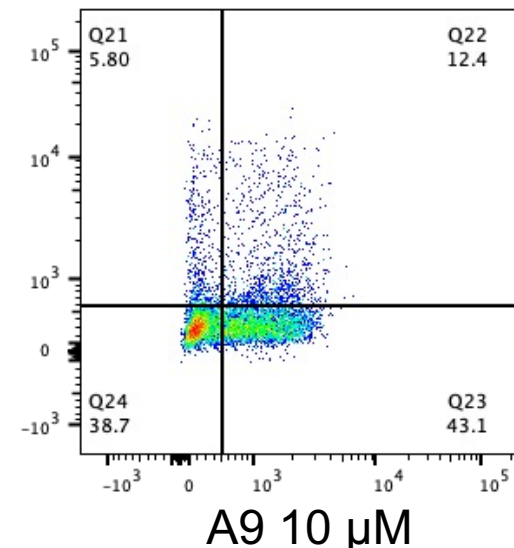

T<sub>reg</sub> to T<sub>conv</sub>  
ratio

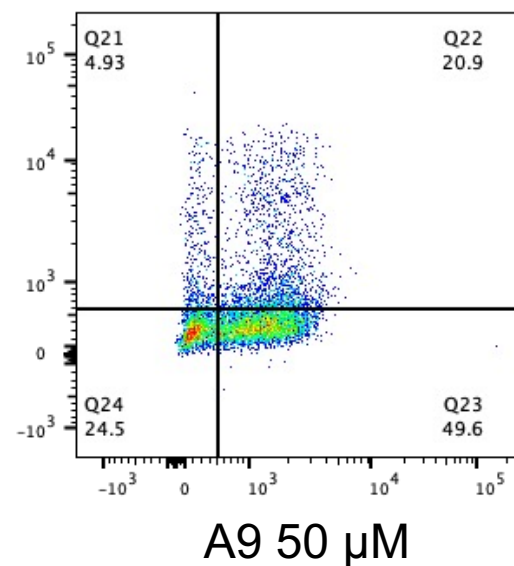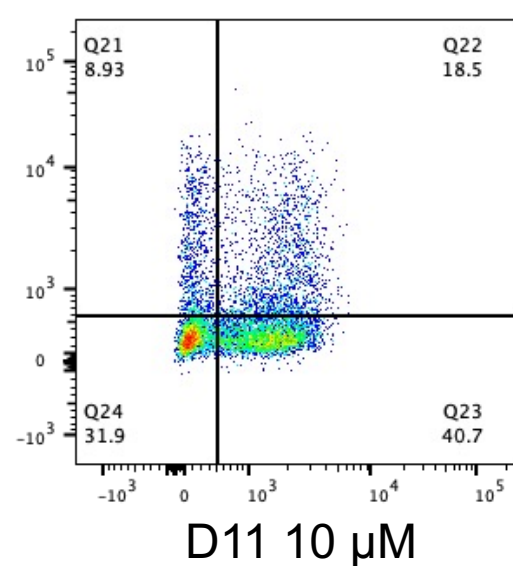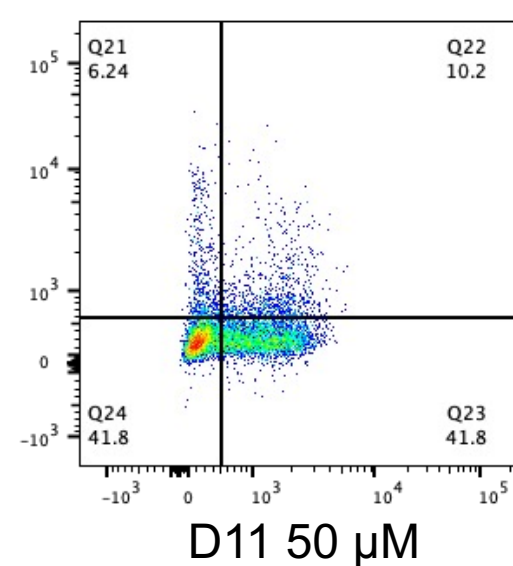

Foxp3  
↑  
CD4  
→

**C**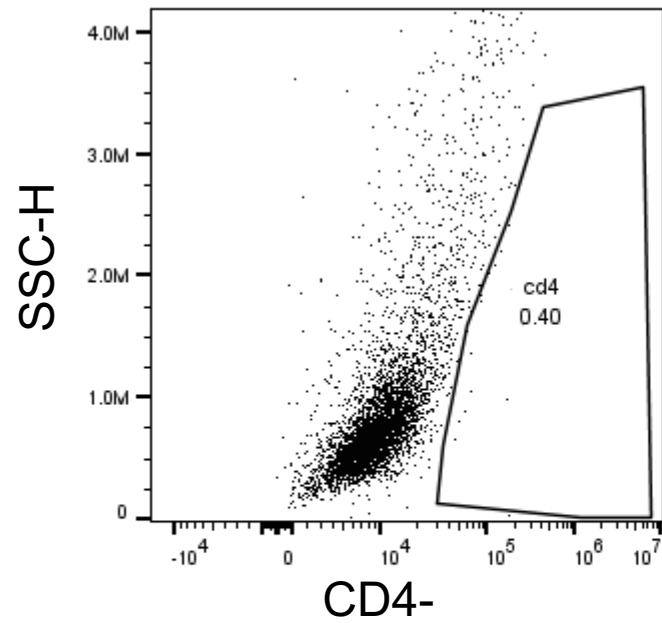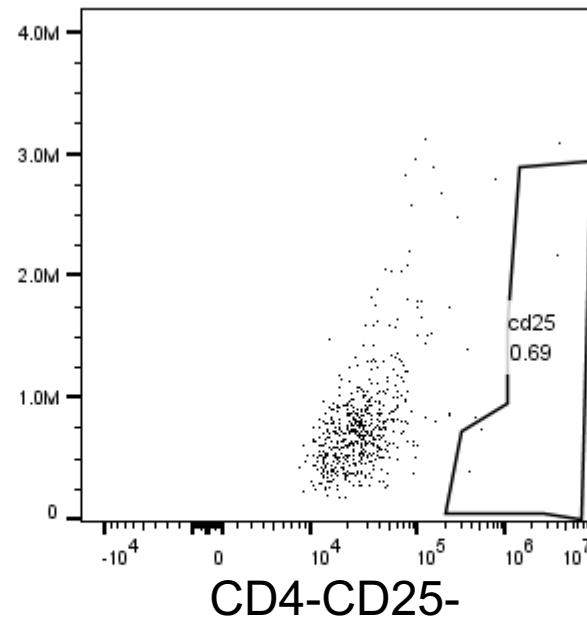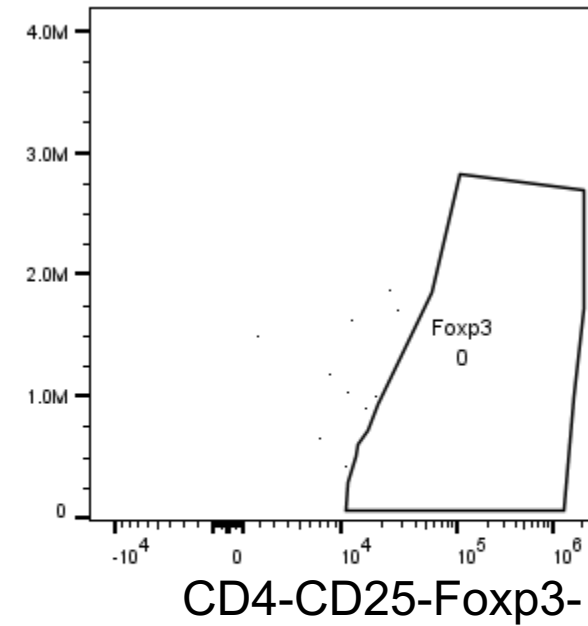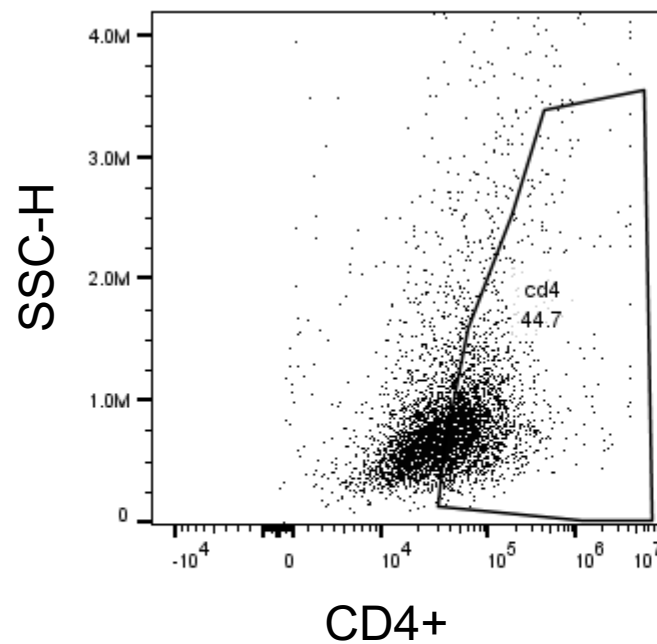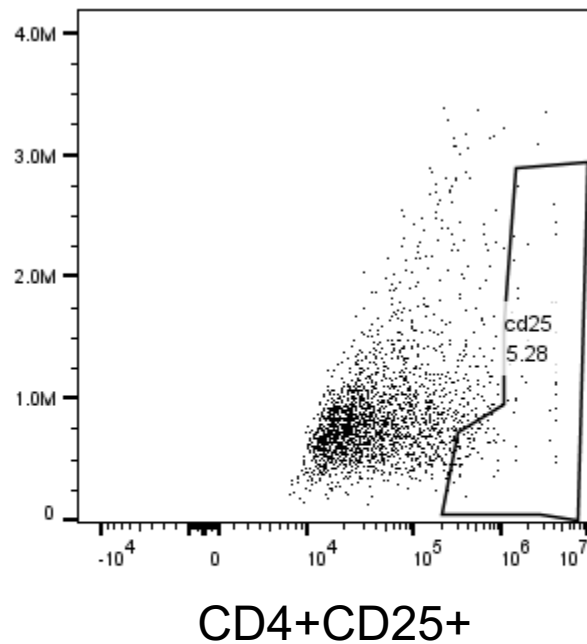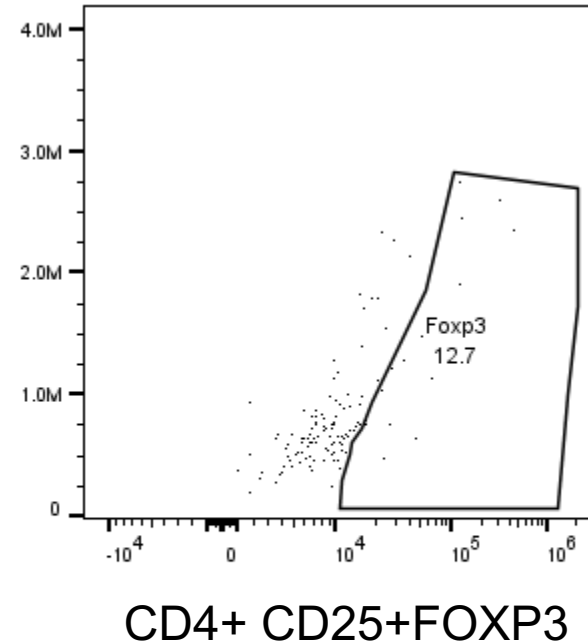

**d**

**Mouse CD4+CD25+FoxP3+ after 25mg/kg treatment**

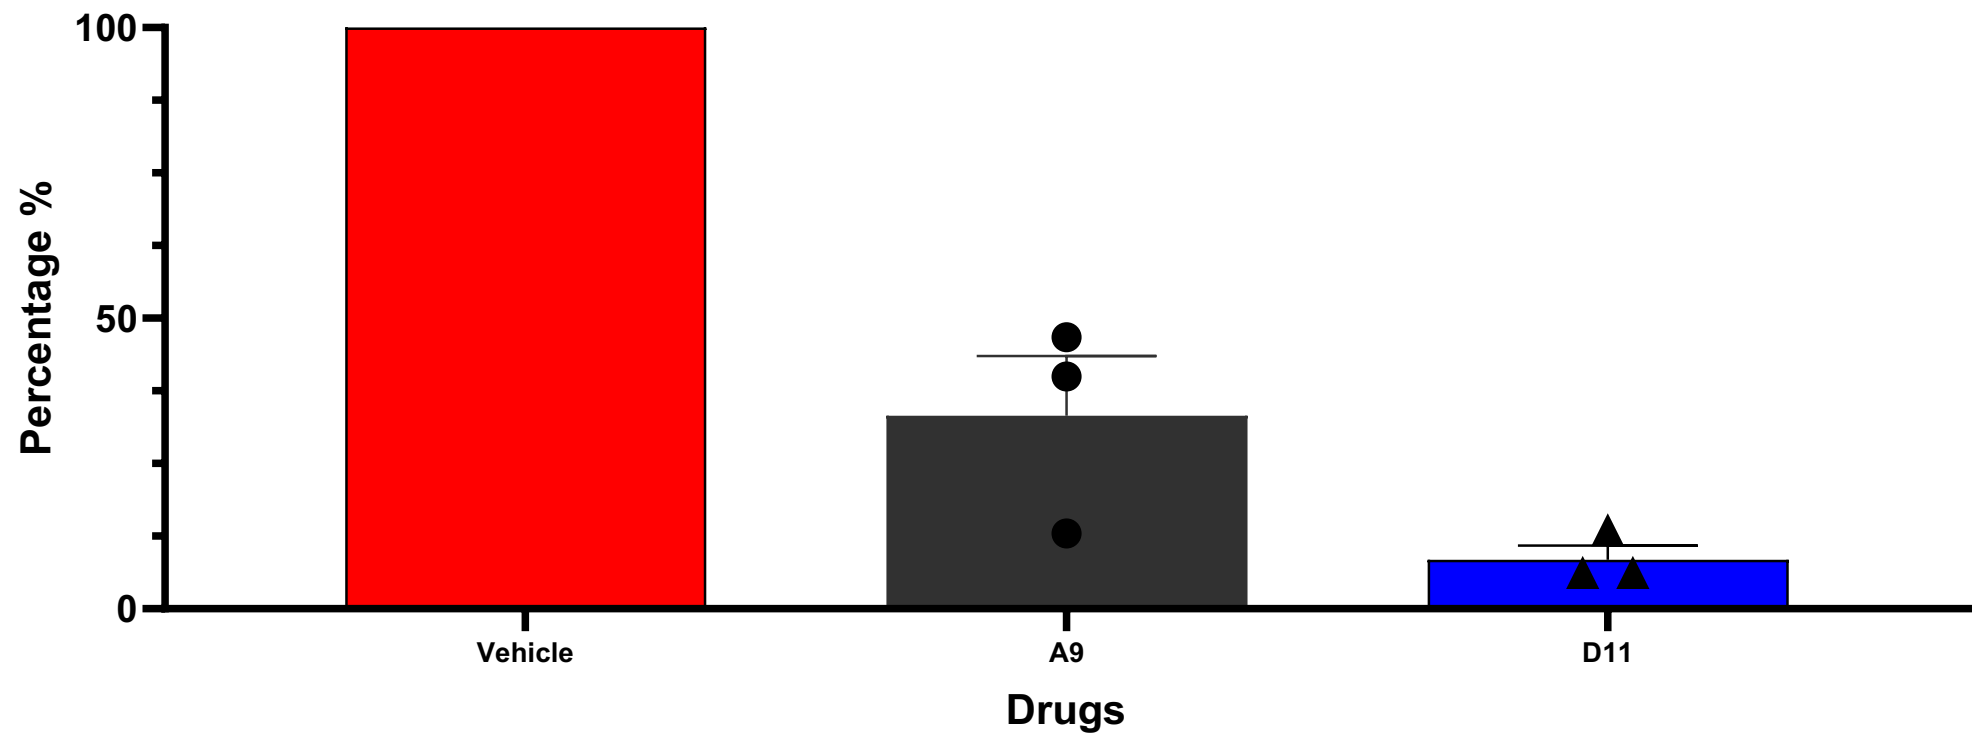

Supplement: 44276_2023_35_MOESM5_ESM.pdf [file 44276_2023_35_MOESM5_ESM.pdf]
