# Supplementary material
Source: PubMed Central journal article supplement (PMC11524066)

**a**

Vehicle Group (n=5)

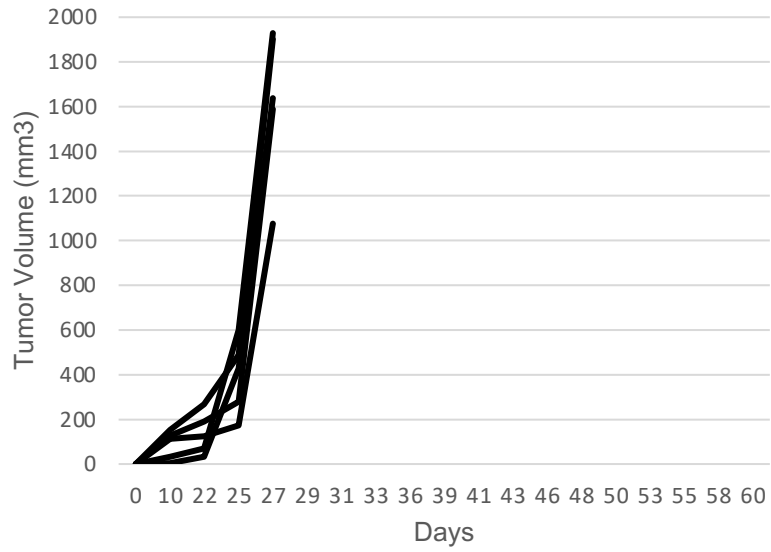

A9 Group (n=10)

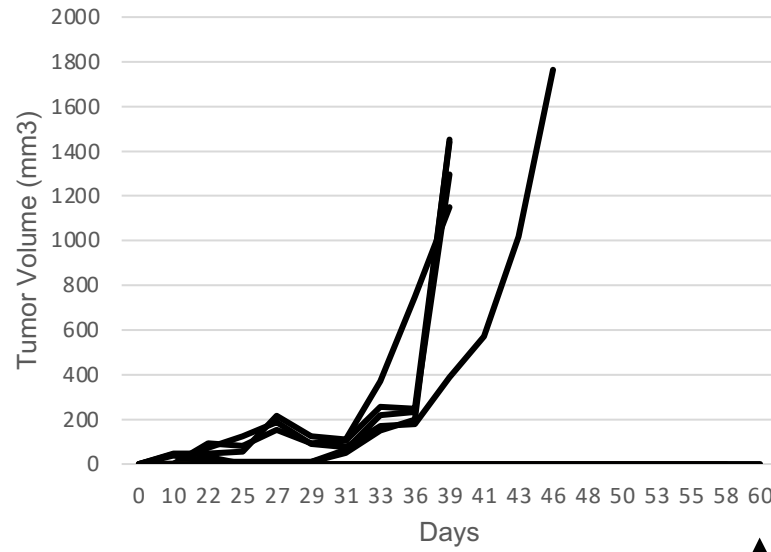

A9 Group rechallenged (n=4)

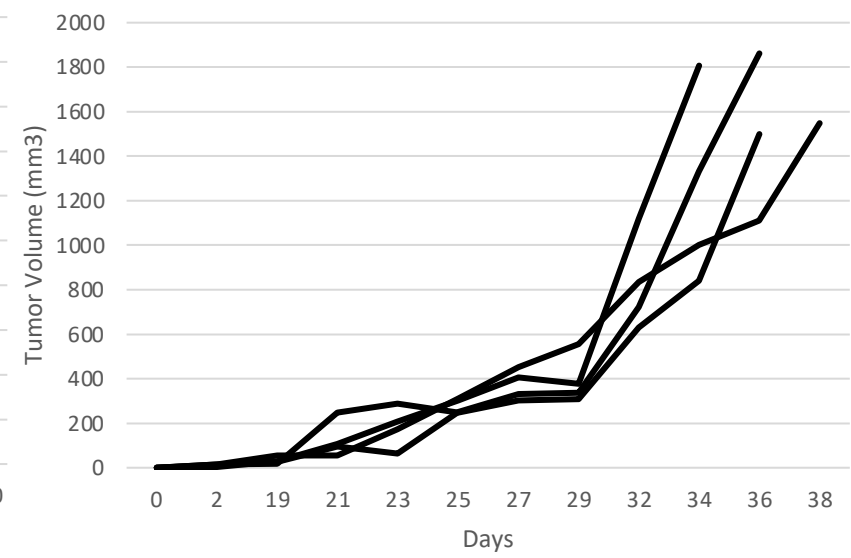

Tumor-free mice  
re-challenged with  
200,000 MC38 cells

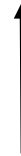



C

Vehicle Group (n=7)

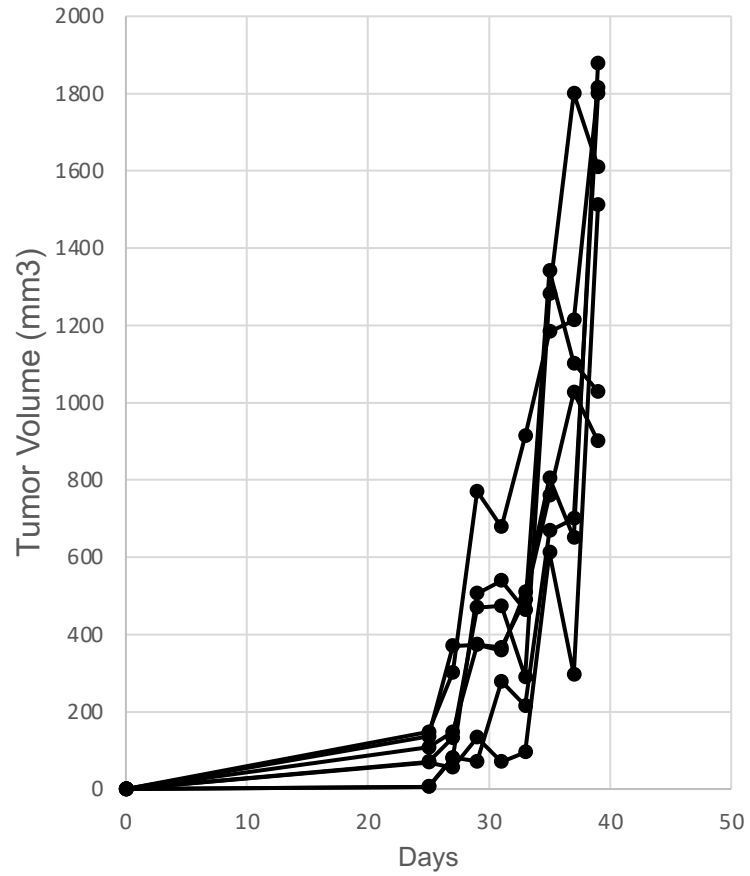

A9 Group (n=7)

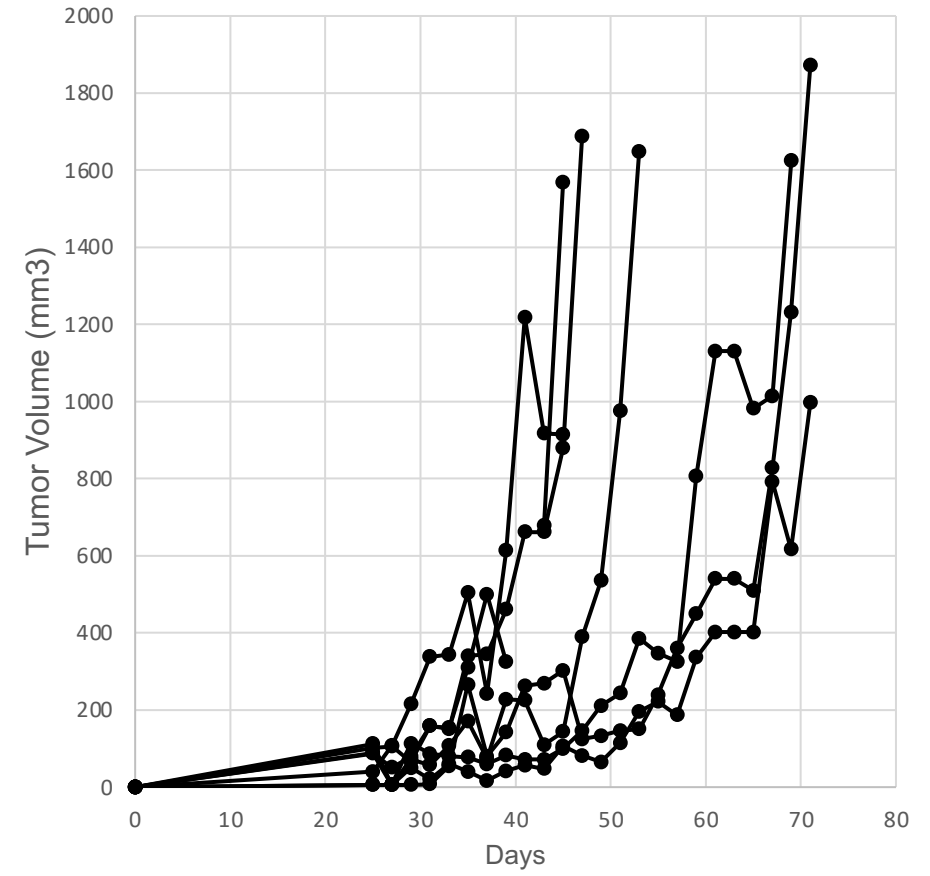

**d**

Vehicle Group (n=4)

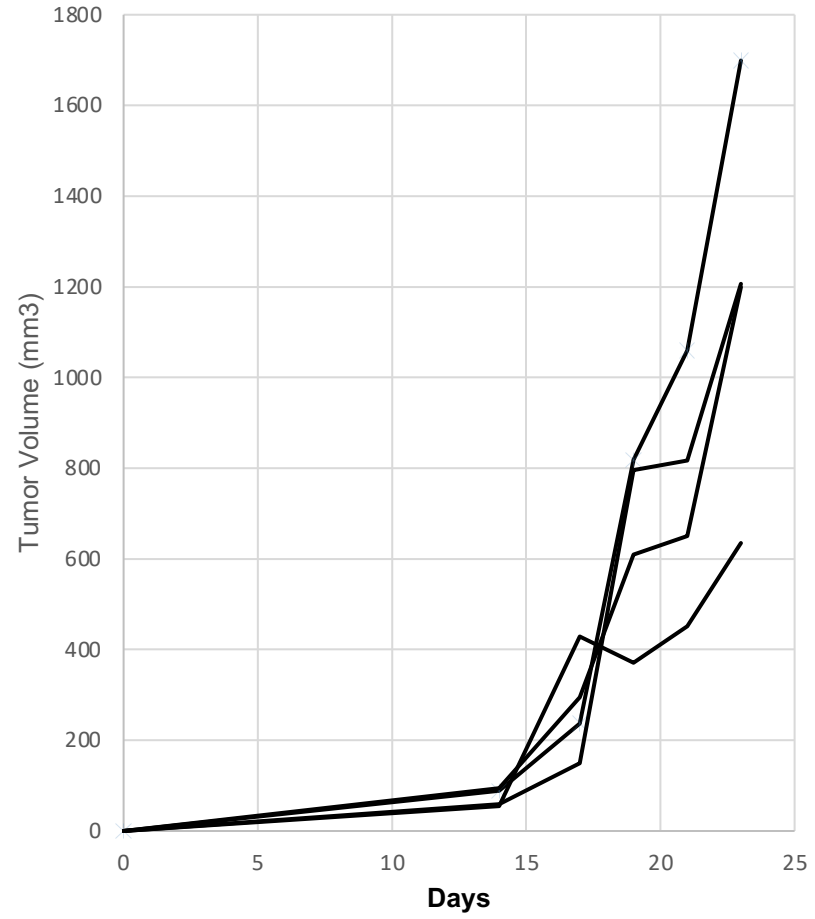

D11 Group (n=5)

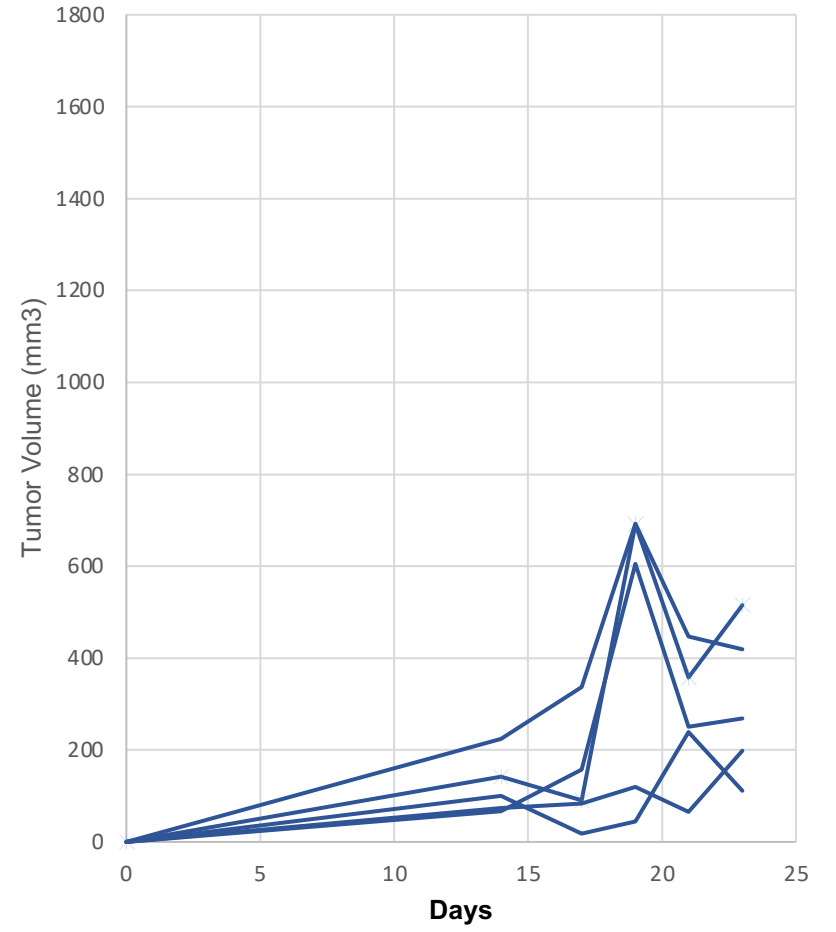

Supplement: 44276_2023_35_MOESM6_ESM.pdf [file 44276_2023_35_MOESM6_ESM.pdf]
