# Supplementary material
Source: PubMed Central journal article supplement (PMC11524066)

**a**

T0- 45 min

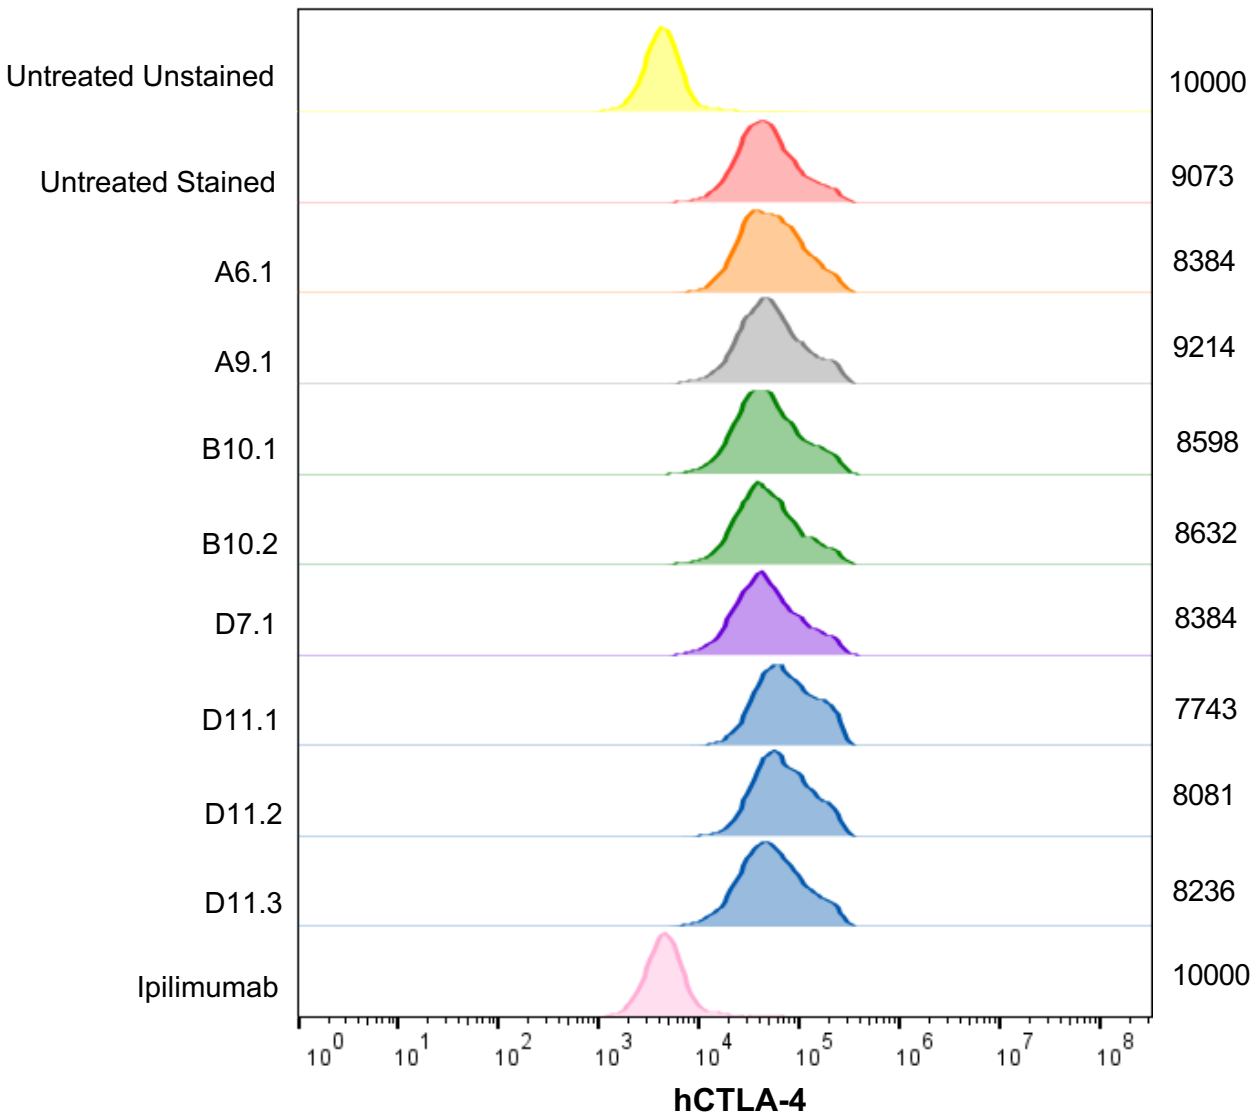**b**

T1- 24h

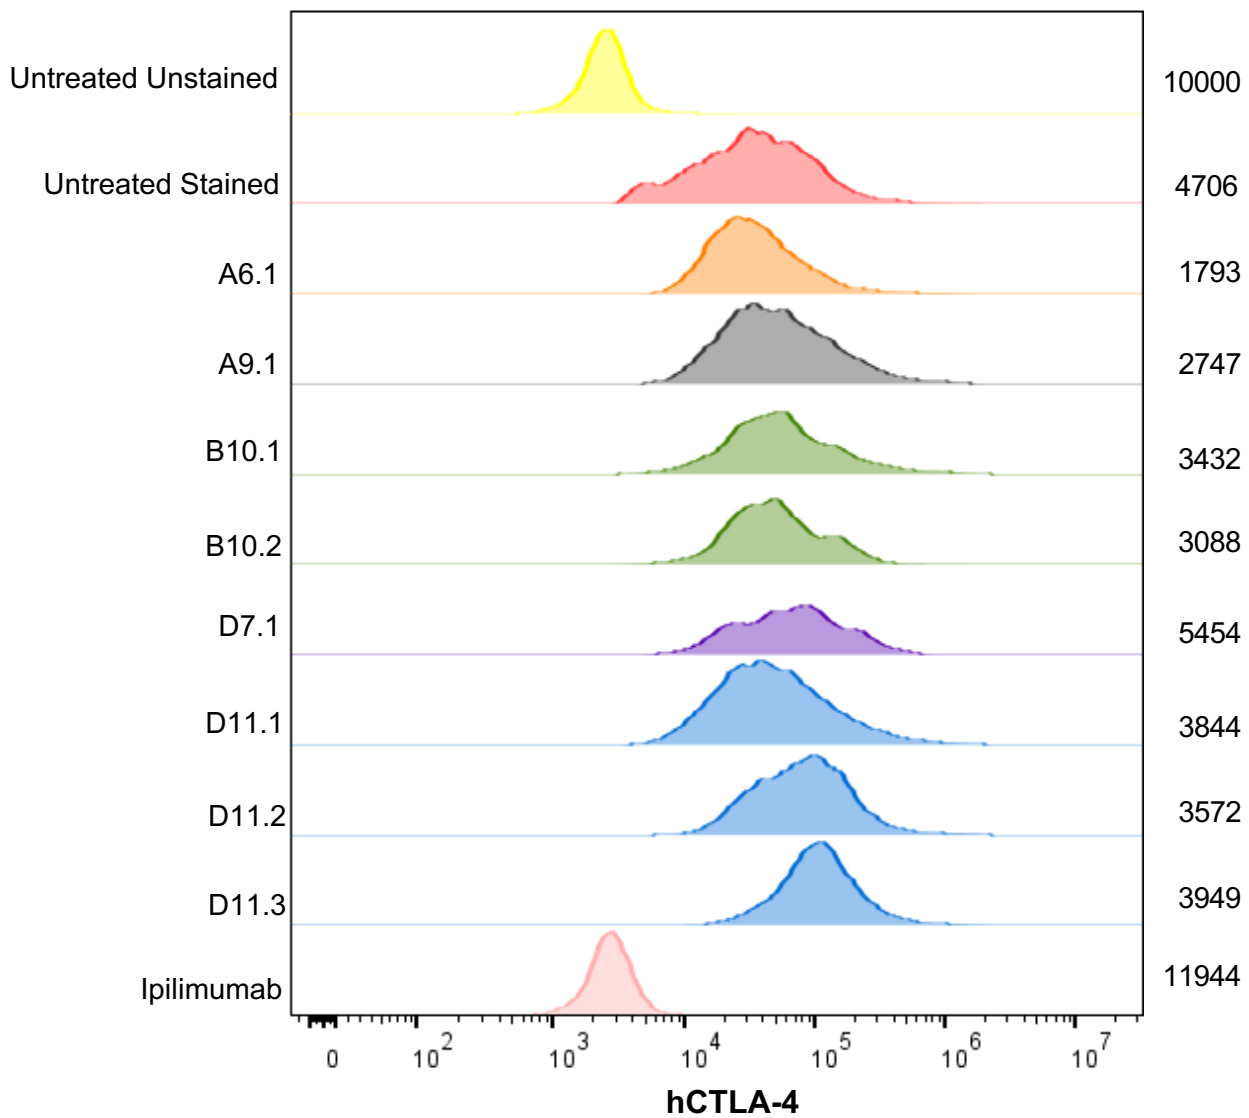



d

Vehicle Group (n=6)

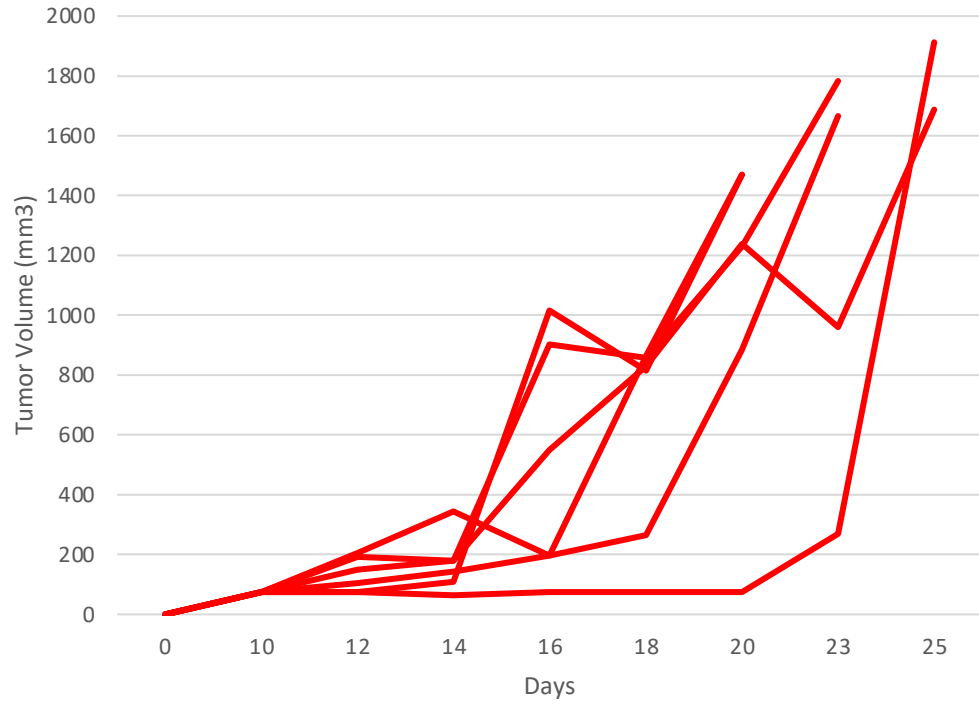

D11.3 Group (n=5)

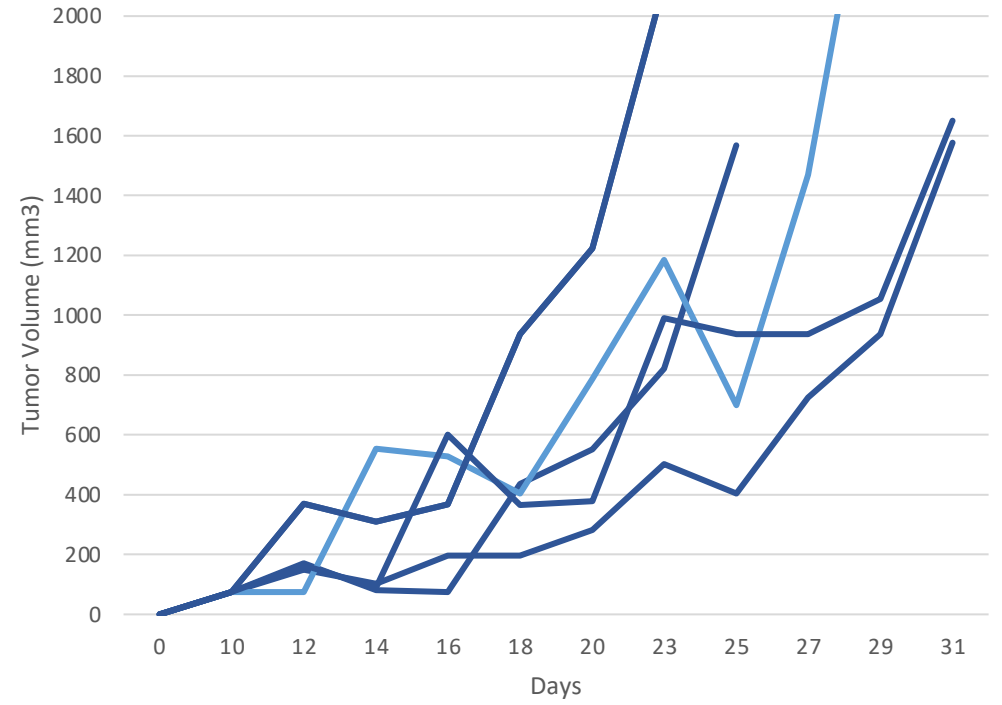

Supplement: 44276_2023_35_MOESM10_ESM.pdf [file 44276_2023_35_MOESM10_ESM.pdf]

**a**

T0- 45 min

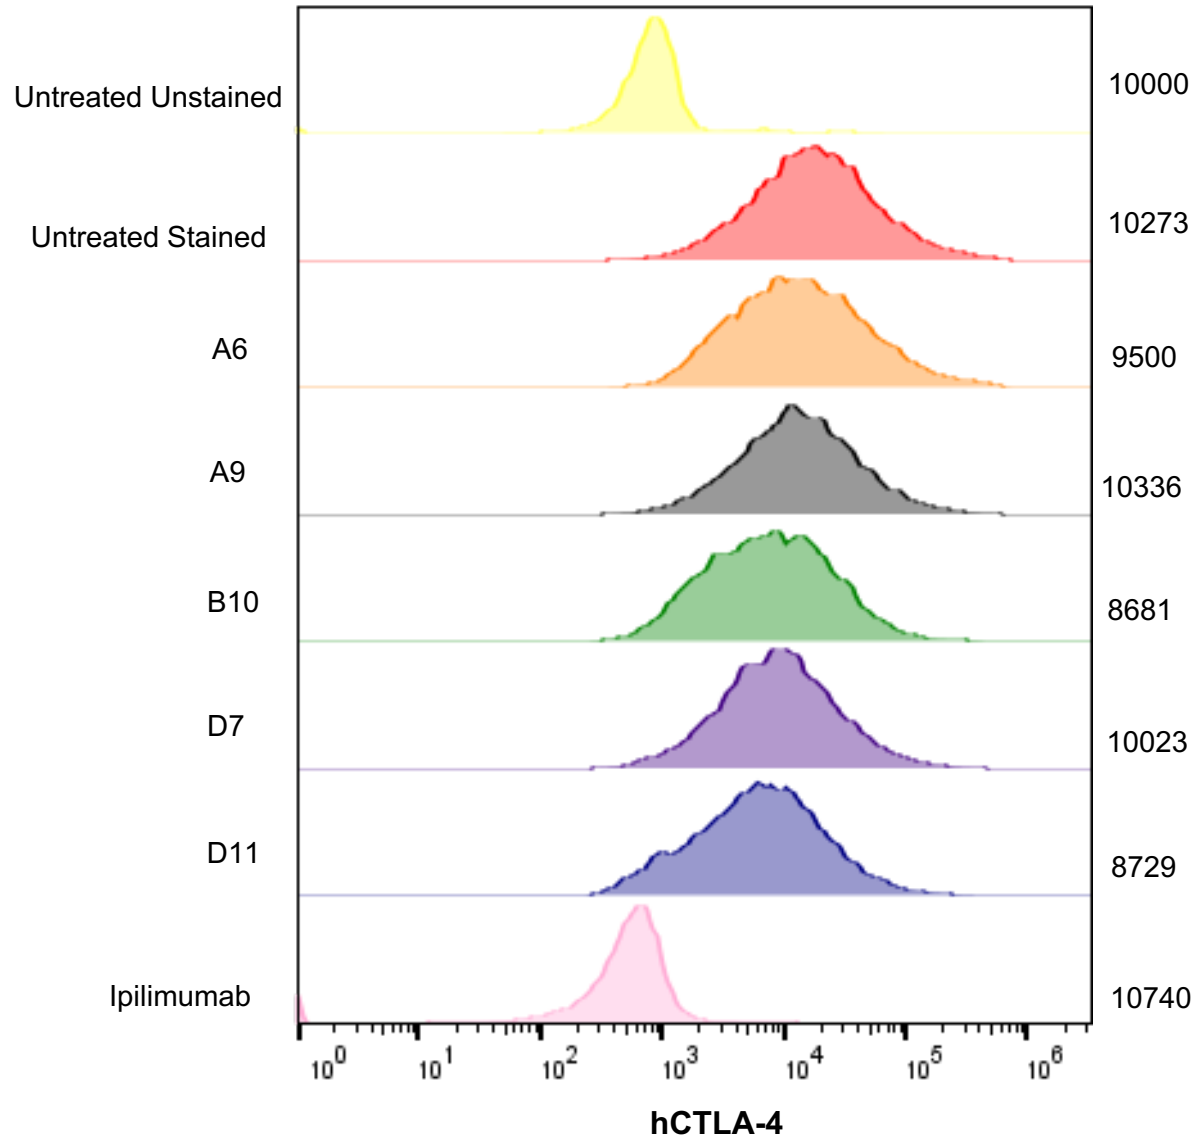**b**

T1- 24h

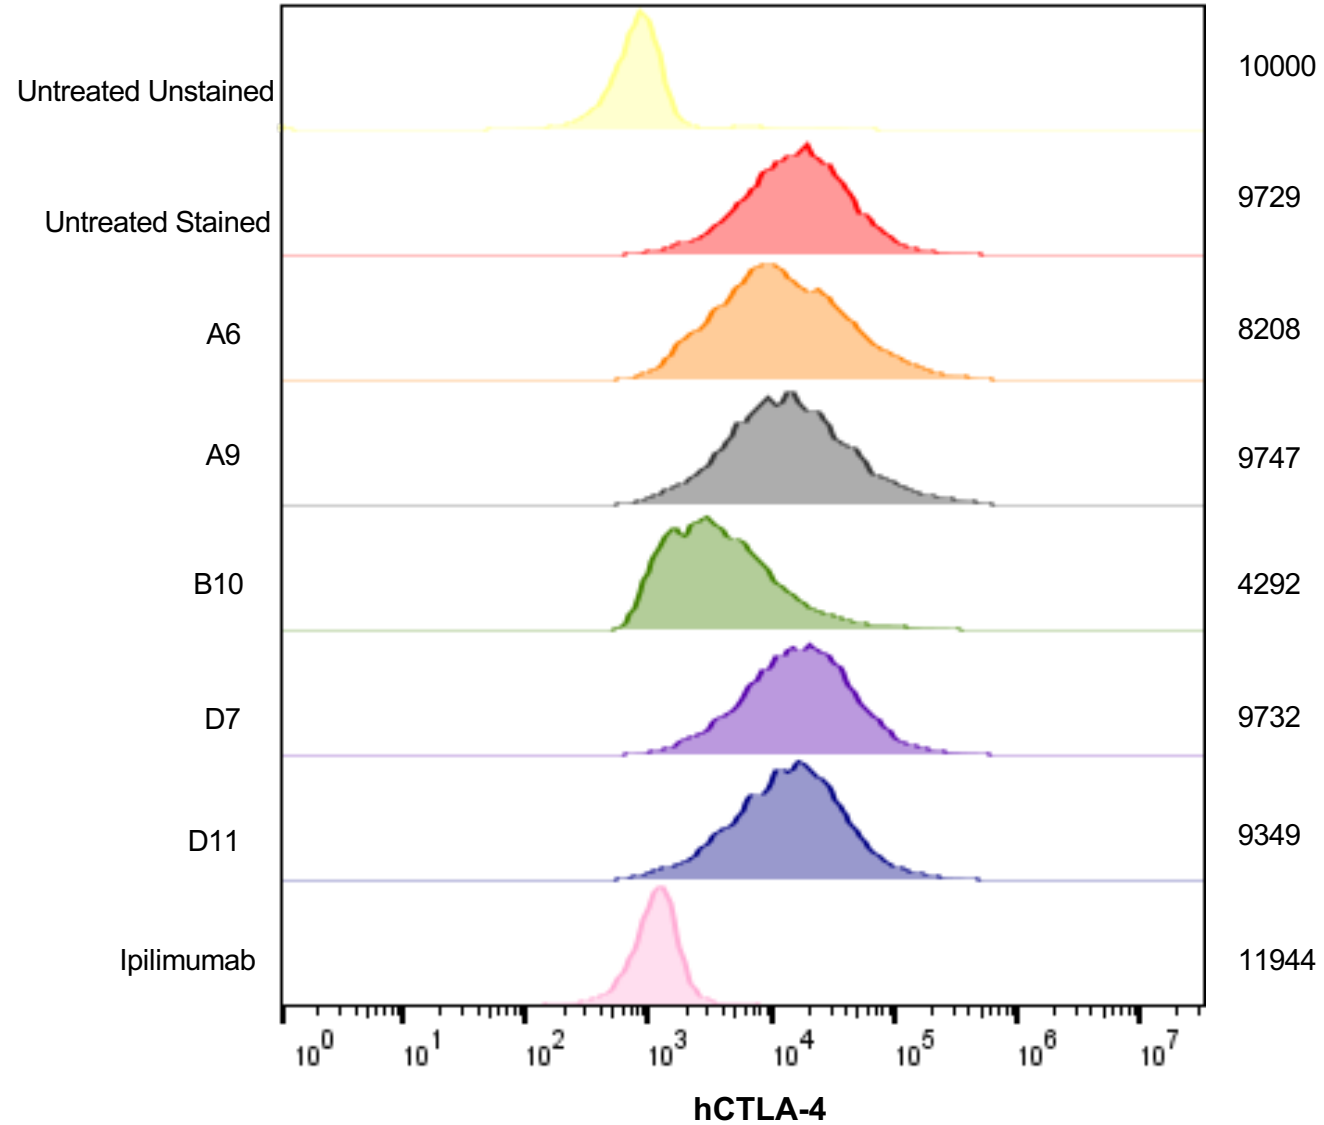

**c**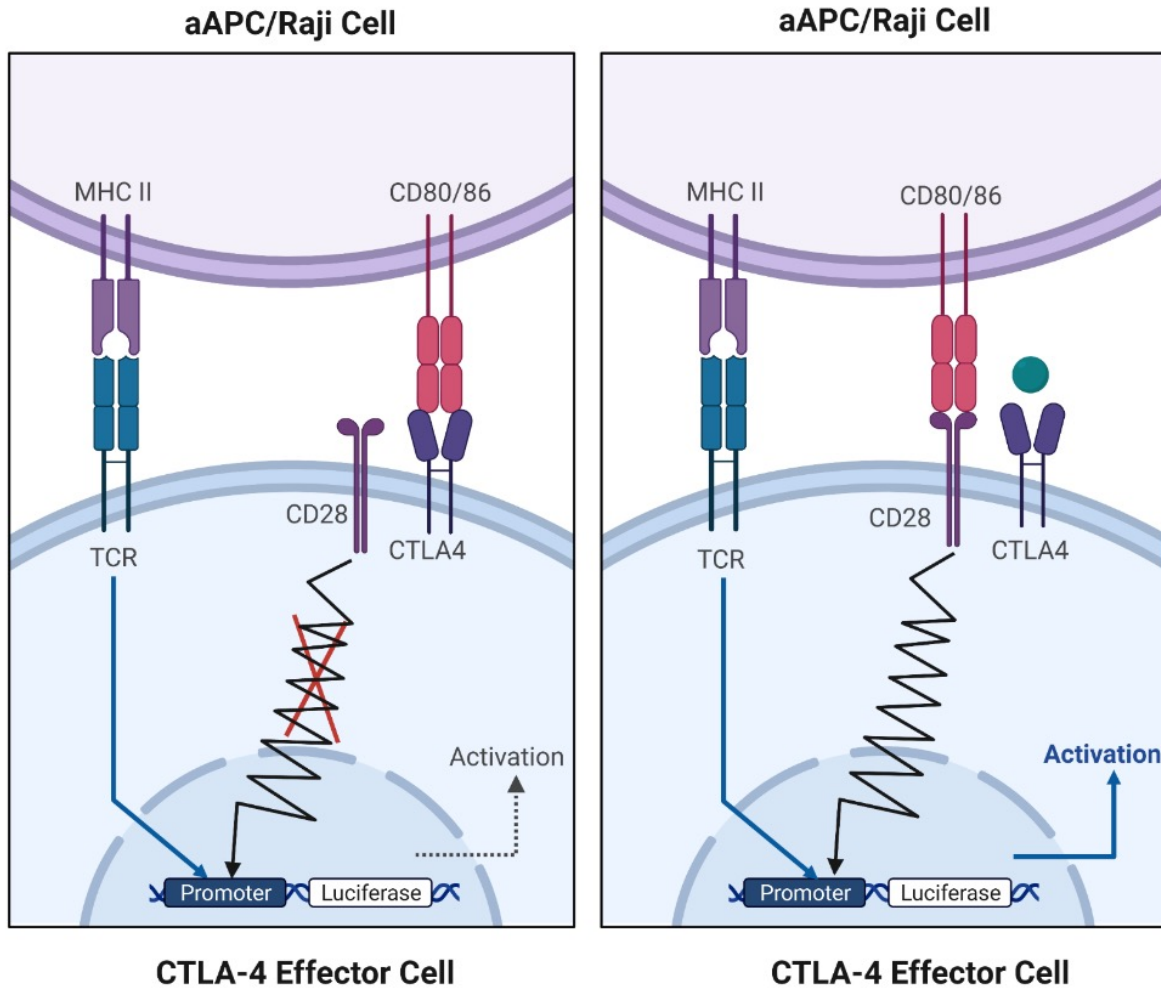**d**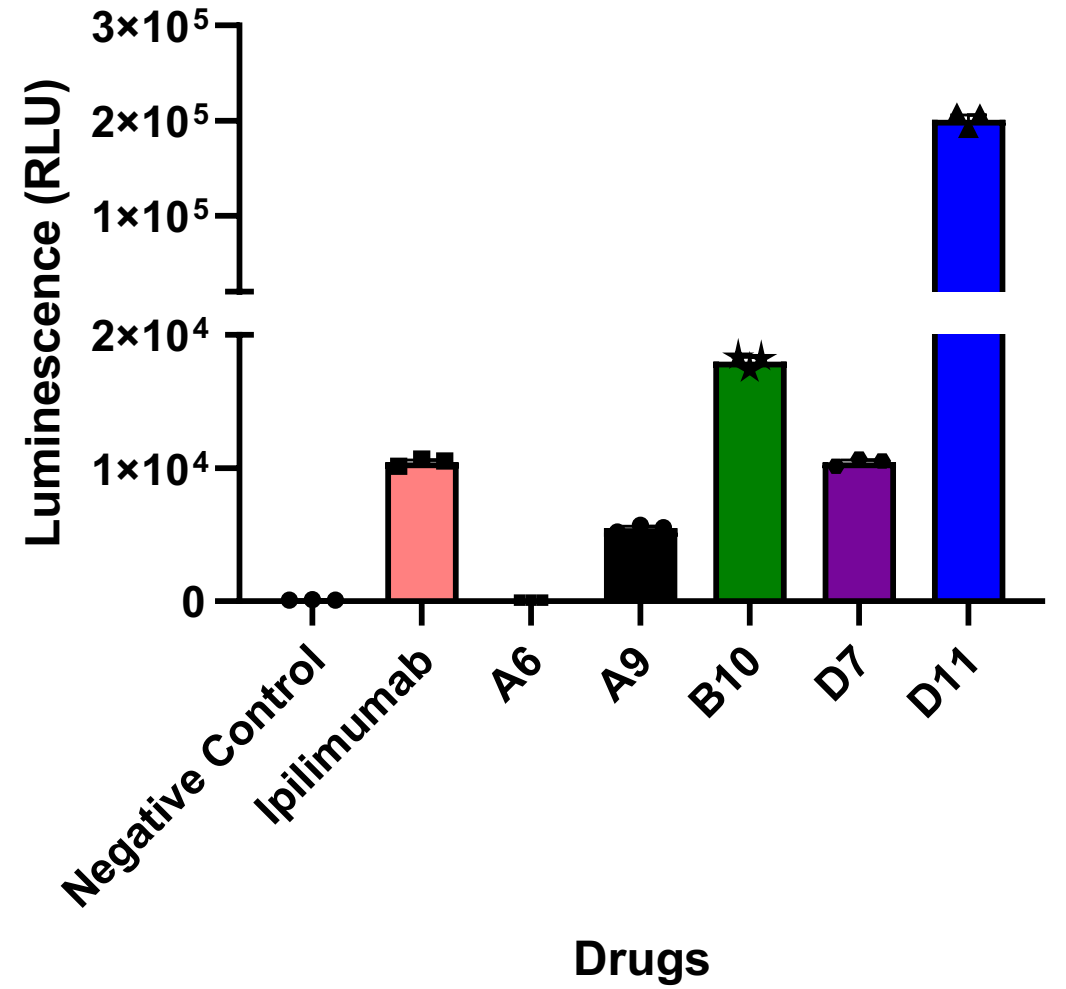

Supplement: 44276_2023_35_MOESM3_ESM.pdf [file 44276_2023_35_MOESM3_ESM.pdf]

**a**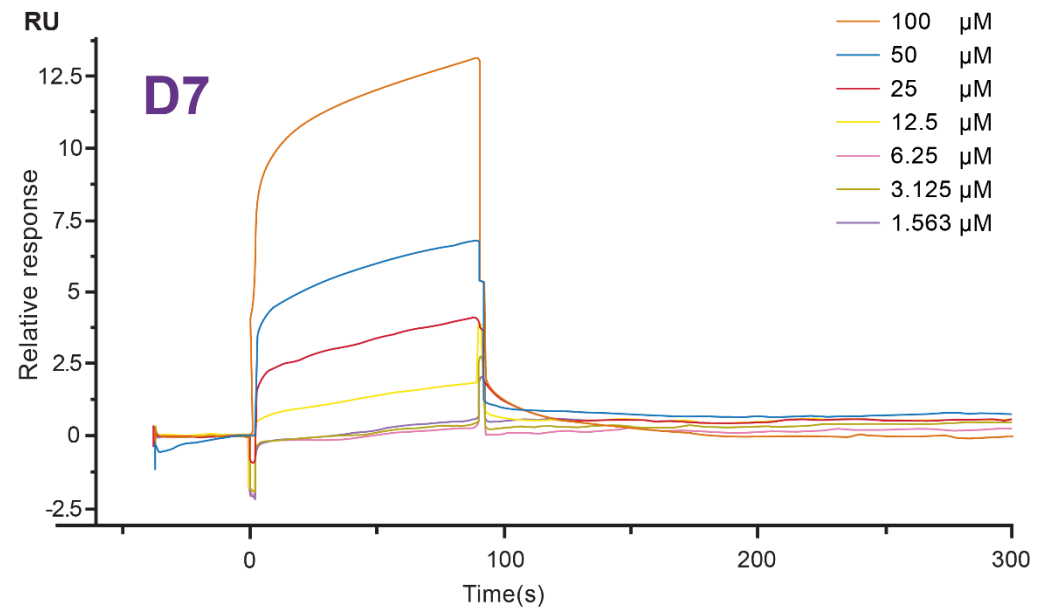**b**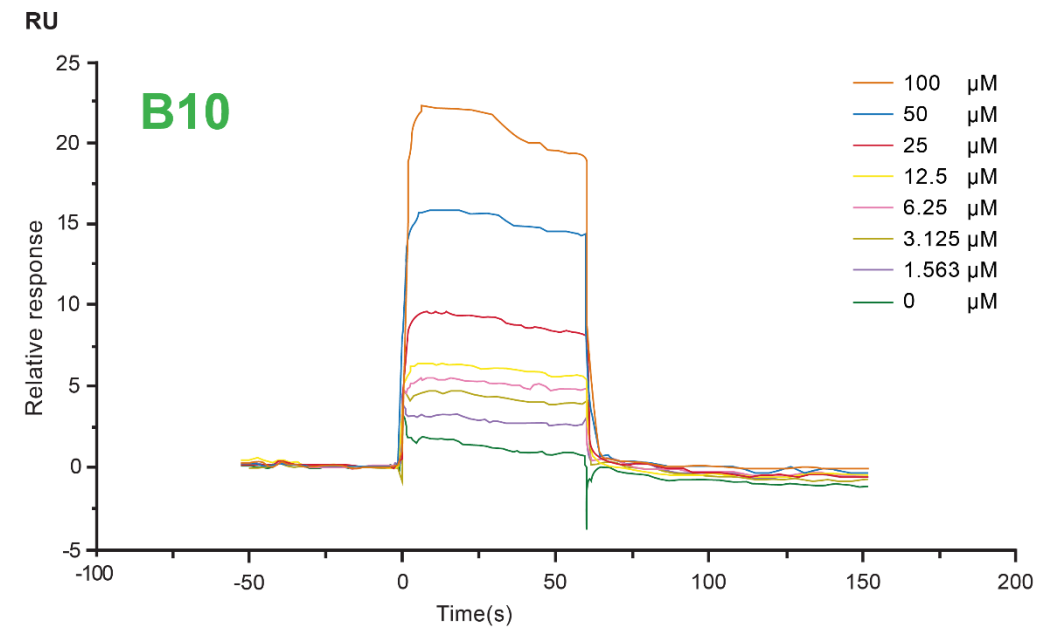**c**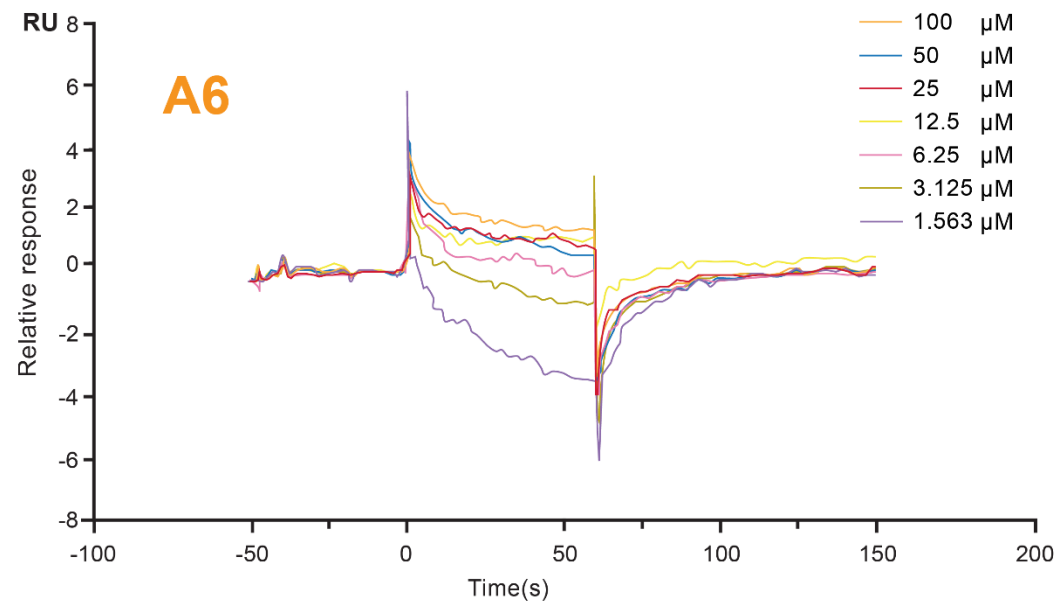

Supplement: 44276_2023_35_MOESM4_ESM.pdf [file 44276_2023_35_MOESM4_ESM.pdf]

Vehicle Group (n=3)

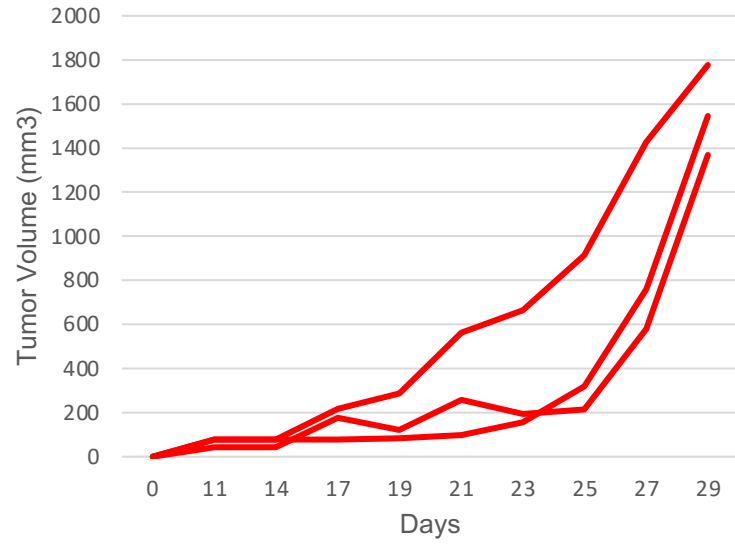

Ipilimumab Group (n=5)

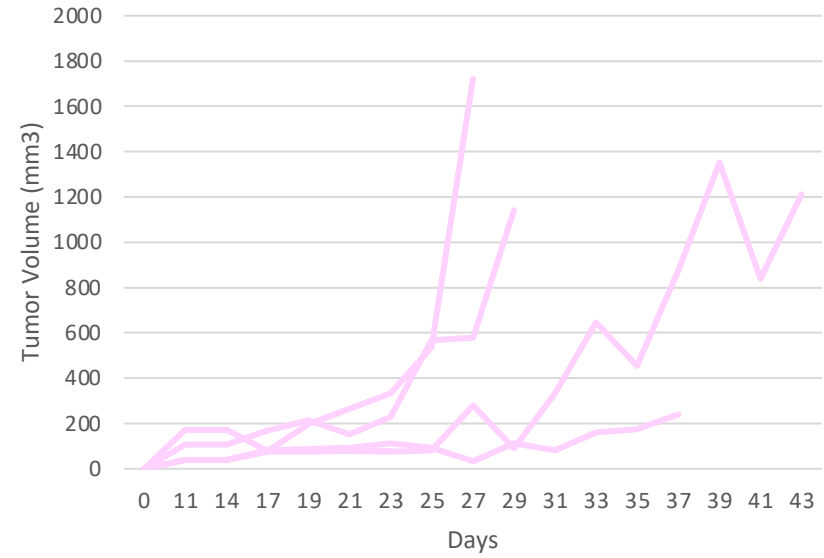

A9 Group (n=5)

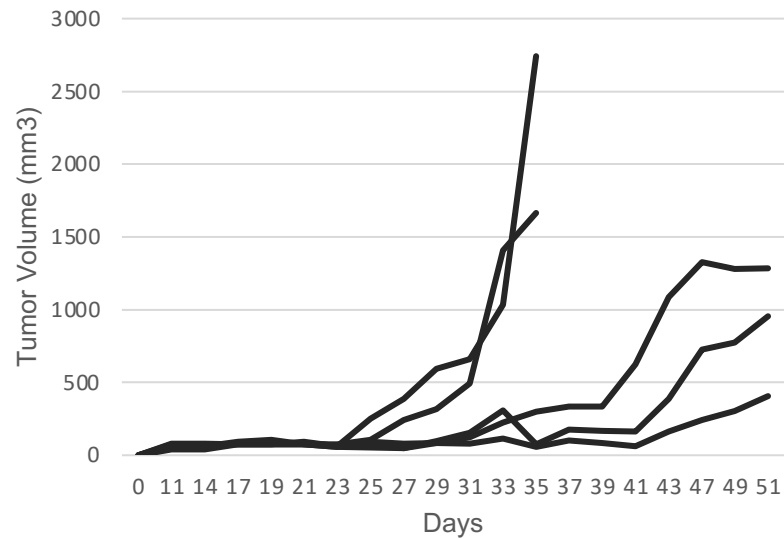

D11 Group (n=5)

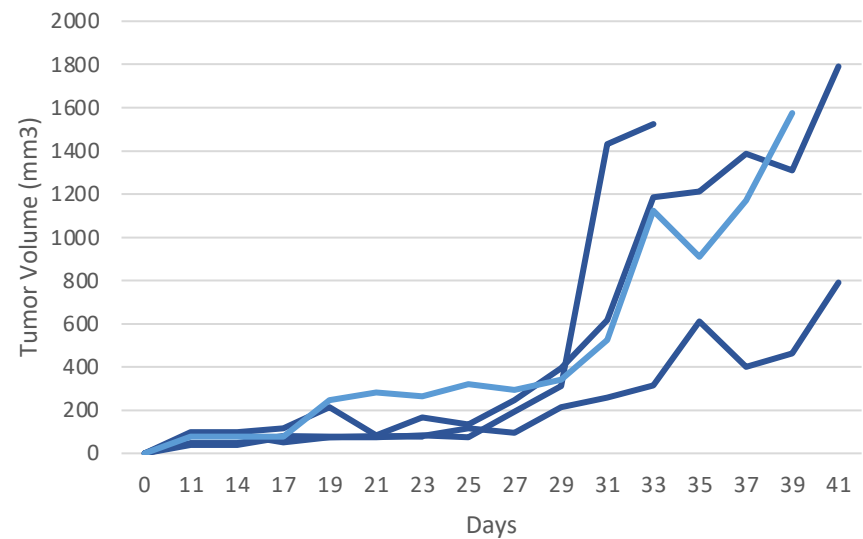

Supplement: 44276_2023_35_MOESM7_ESM.pdf [file 44276_2023_35_MOESM7_ESM.pdf]

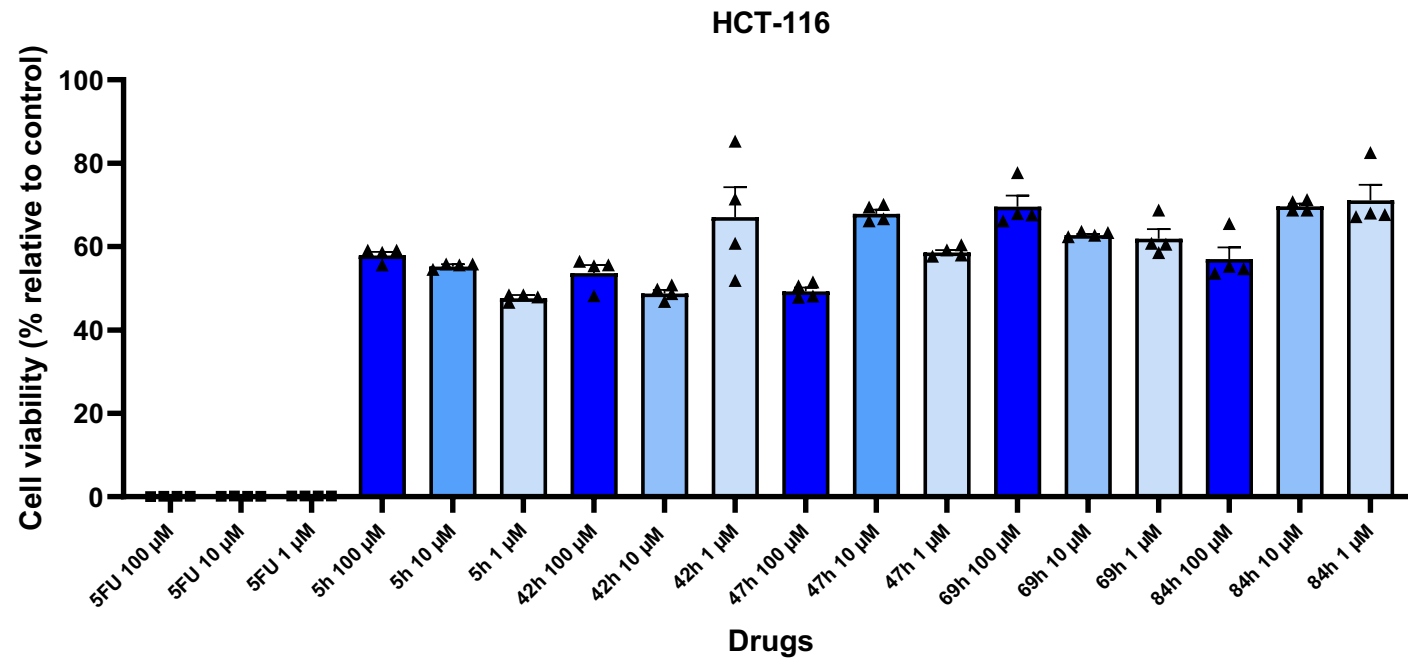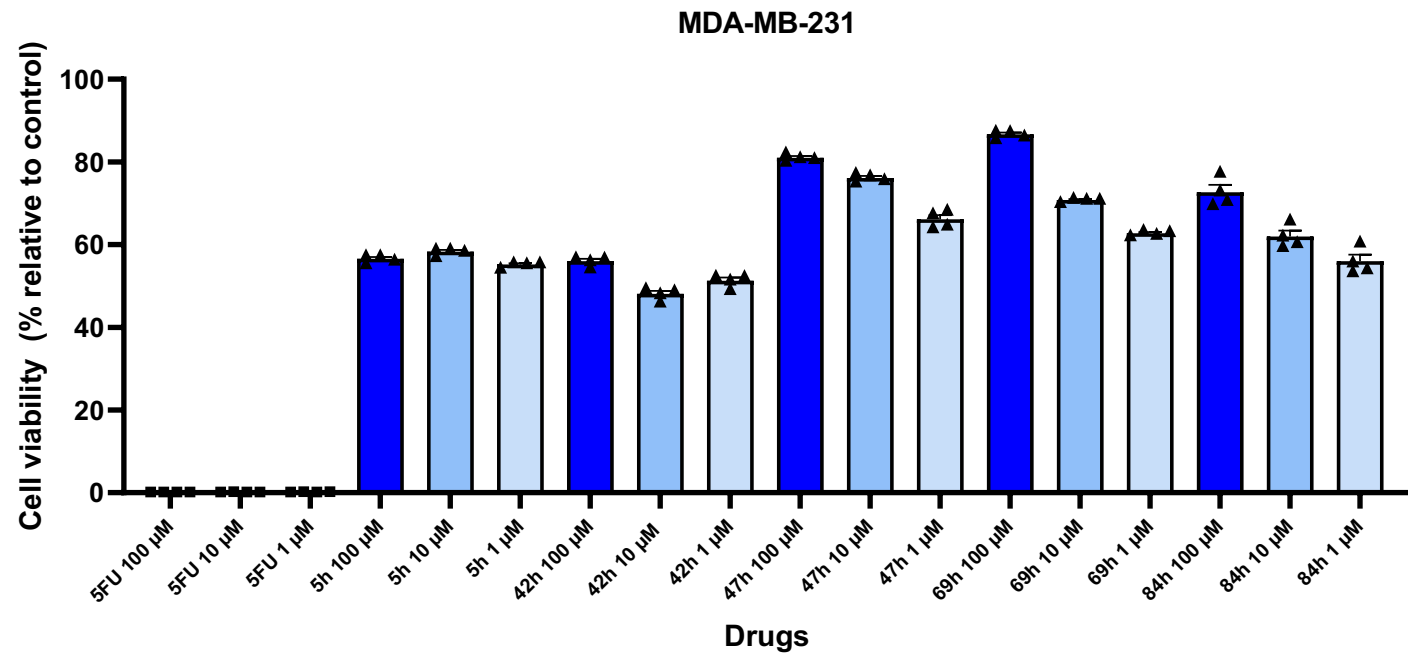

Supplement: 44276_2023_35_MOESM8_ESM.pdf [file 44276_2023_35_MOESM8_ESM.pdf]

D11 Group (n=5)

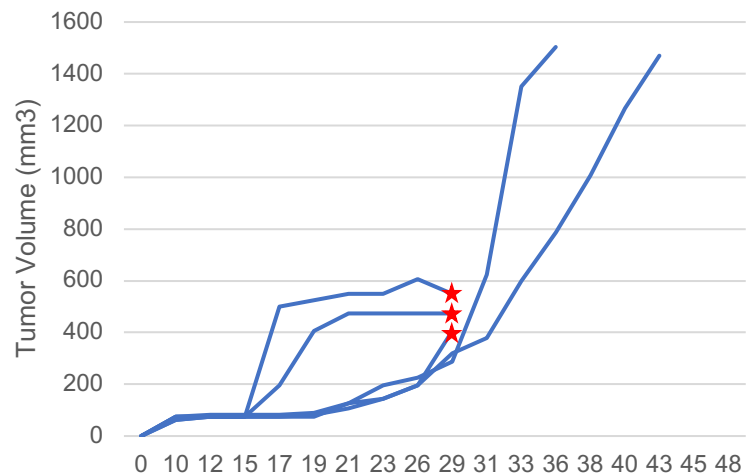

Anti-PD-1 Group (n=4)

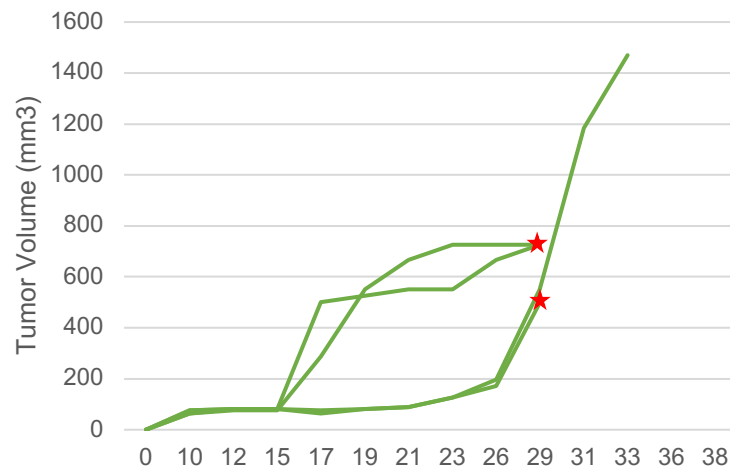

D11+ Anti-PD-1 Group (n=5)

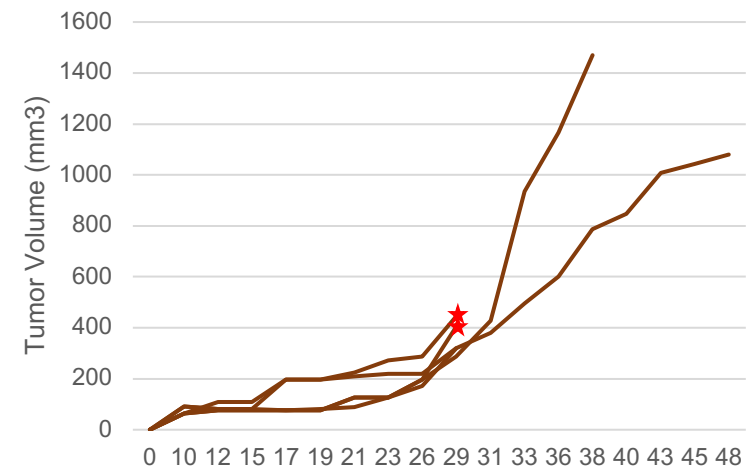

Ipilimumab Group (n=5)

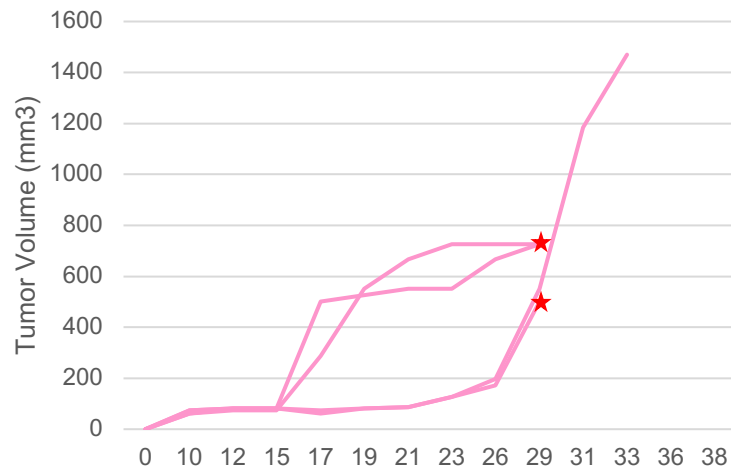

Vehicle Group (n=4)

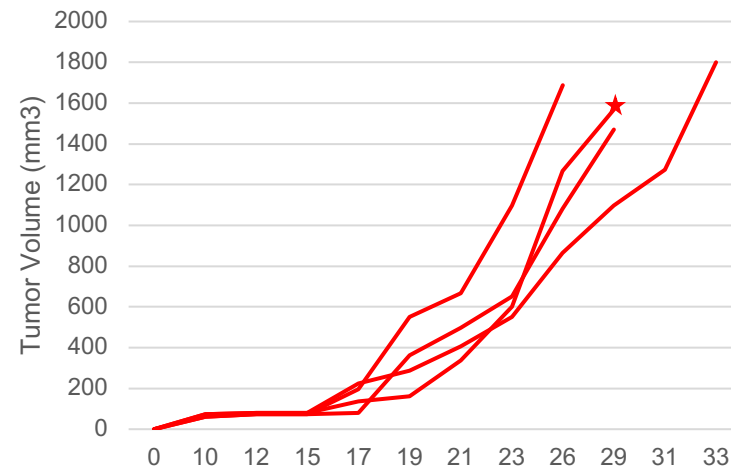

Supplement: 44276_2023_35_MOESM9_ESM.pdf [file 44276_2023_35_MOESM9_ESM.pdf]
